# Supplementary material
Source: publisher site journal article supplement (https://www.spandidos-publications.com/3623/downloadSupplementary)

Figure S1. Confirmation of miR-218 overexpression in PC12 cells. The mRNA expression of miR-218 was determined in PC12 cells transfected with miR-NC or miR-218 mimic, using reverse transcription-quantitative PCR analysis. All experiments were repeated three times. Data are expressed as mean  $\pm$  SD. \*\*\* $P$ <0.001. miR, microRNA; NC, negative control.

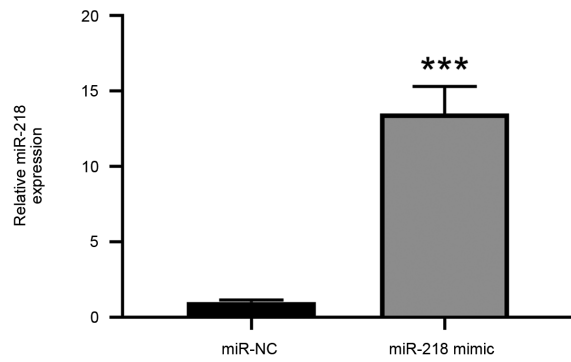

Supplement: Supplementary file 1 [file downloadSupplementary]
